# Supplementary material for: Poly(vinylbenzyl chloride)-based poly(ionic liquids) as membranes for CO2 capture from flue gas
Source: Royal Society of Chemistry journal article supplement (doi:10.1039/c7ta05171a), 2017-01-01
Supplement: c7ta05171a1.pdf [file c7ta05171a1.pdf]

## Electronic Supplementary Information for “Poly(vinylbenzyl chloride)-based poly(ionic liquids) as membranes for CO<sub>2</sub> capture from flue gas”.

D. Nikolaeva,<sup>a</sup> I. Azcune<sup>b</sup>, E. Sheridan<sup>c</sup>, Marius Sandru<sup>c</sup>, A. Genua<sup>b</sup>, M. Tanczyk<sup>d</sup>, M. Jaschik<sup>d</sup>, K. Warmuzinski<sup>d</sup>, J.C. Jansen<sup>e</sup> and I.J.F. Vankelecom<sup>\*a</sup>

### Introduction

#### 1 On the role of CO<sub>2</sub> affinity

Although, the role of CO<sub>2</sub> affinity towards PILs has been widely acknowledged, the underlying fundamentals have never been systematically studied. For polymerized ILs, a study on the CO<sub>2</sub> sorption revealed a clear influence of the chemical composition of cationic pendants and anions.<sup>1</sup> The reported results suggest that CO<sub>2</sub> sorption in studied PILs with identical cationic species decreases in the row of anions as follows: [PF<sub>6</sub>]<sup>-</sup>>[BF<sub>4</sub>]<sup>-</sup>>[Tf<sub>2</sub>N]<sup>-</sup>. Moreover, the capability of IL-based materials to absorb CO<sub>2</sub> decreases in the following order P[VBtMA]<sup>+</sup>>P[MatMA]<sup>+</sup>>[DTEA]<sup>+</sup>>[bmim]<sup>+</sup>>[VBtMA]<sup>+</sup>>[MatMA]<sup>+</sup> for the identical anion [BF<sub>4</sub>]. The DMM parameters derived in this study were based on the sorption experiments up to 1 bar.<sup>1</sup> Even though, the sorption isotherms have been successfully fitted into DMM, the pressure range can be considered insufficient for that kind of approximation.<sup>2</sup> Additionally, the influence of the material history was demonstrated on the PILs synthesized from the neutral polymers.<sup>3-4</sup> The post-modified P[VBtMA][Ac] and P[VBtMA][BF<sub>4</sub>] were prepared from commercially available PVBC via anion metathesis. Remarkable, the Langmuir saturation constant increased in 7 times when compared to pristine material.<sup>3</sup> The comparison of CO<sub>2</sub> sorption isotherms reported for P[VBtMA][BF<sub>4</sub>] demonstrated a strong disagreement between the measurements (Fig.1). This clearly signifies the variability in the synthesized PILs, that is often observed when obtained in batches on the lab-scale.

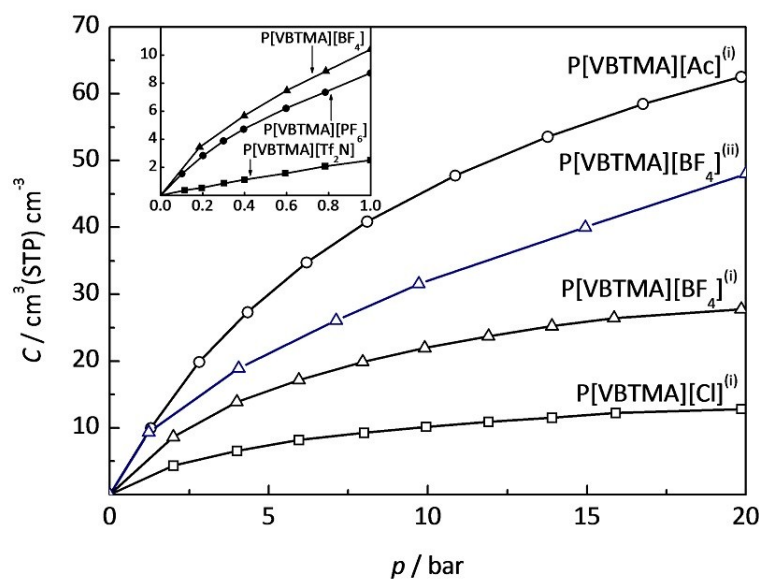

**Fig. 1** Overview of CO<sub>2</sub> sorption isotherms reported for PILs based on the P[VBtMA]<sup>+</sup> polycation. The data adopted from (i)<sup>3</sup>, (ii)<sup>4</sup>, (inlet)<sup>1</sup>.

## 2 Separation performance of PILs-based membranes reported in the literature

**Table 1** Summary of physicochemical properties and separation performance of PILs.

| Precursor <sup>a</sup>                                                             | Treatment                                       | PILs                                  | Membrane            |                                      | Performance           |                          | Comments                                                                              | Reference |
|------------------------------------------------------------------------------------|-------------------------------------------------|---------------------------------------|---------------------|--------------------------------------|-----------------------|--------------------------|---------------------------------------------------------------------------------------|-----------|
|                                                                                    |                                                 |                                       | Sample <sup>b</sup> | $\delta_{AL}^c$<br>[ $\mu\text{m}$ ] | $\alpha_{CO_2/N_2}^d$ | $P_{CO_2}^e$<br>[Barrer] |                                                                                       |           |
| MMA                                                                                | Synthesis of diblock-copolymers                 | p[MEBEm-TFSI];<br>p[MMA-b-MUBIm-TFSI] | T                   | 70 - 240                             | 28.5                  | 22.8                     | ideal permselectivity                                                                 | 5         |
| Styrene/ acrylate-based RTIL monomers                                              | Photoinitiated polymerisation                   |                                       | T                   | 145                                  | 28 - 32               | 7 - 32                   | ideal permselectivity                                                                 | 6         |
| OEG1, OEG2, (CH <sub>2</sub> ) <sub>3</sub> CH, (CH <sub>2</sub> ) <sub>5</sub> CN | Photoinitiated polymerisation                   | PILs with polar substituents          | T                   | 145                                  | 37 - 44               | 4.1 - 22                 | ideal permselectivity                                                                 | 7         |
| Styrene/Imim-based RTIL                                                            | Photoinitiated polymerisation in presence of IL |                                       | T                   | 200                                  | 39                    | 44                       | ideal permselectivity                                                                 | 8         |
| P[DADMA]Cl                                                                         | Anion methathesis                               |                                       | -                   | -                                    | 114.3                 | -                        | sorption selectivity                                                                  | 3         |
| PBI                                                                                | Polycondensation                                |                                       | -                   | -                                    | 2.66 - 12.60          | -                        | sorption selectivity                                                                  | 9         |
| [EMIM][BF <sub>4</sub> ]; PVDF-HFP                                                 | Polymer conditioning with IL                    | Polymer gel membranes                 | T                   | 100 - 200                            | 50 - 60               | 45 - 400                 | mixed-gas selectivity;<br>CO <sub>2</sub> /N <sub>2</sub> =50/50<br>2 atm; 35 - 45 °C | 10        |

<sup>a</sup> Precursor material abbreviation as used in the reference.

<sup>b</sup> Morphology of the selective layer abbreviated as 'T' and 'TFC' for thick dense and thin film composite membranes, respectively. '-' marks the materials which were too brittle to obtain a membrane sample.

<sup>c</sup> Thickness of the selective layer.

<sup>d</sup> Selectivity for CO<sub>2</sub>

<sup>e</sup> Permeability for CO<sub>2</sub>

|                                                                                                                                                         |                                                                        |                                  |     |           |          |              |                                                                                   |    |
|---------------------------------------------------------------------------------------------------------------------------------------------------------|------------------------------------------------------------------------|----------------------------------|-----|-----------|----------|--------------|-----------------------------------------------------------------------------------|----|
| AAIL                                                                                                                                                    | Photoinitiated polymerisation in presence of IL                        | Polymer gel membranes            | T   | 300       | 60 - 230 | 1000 - 10000 | mixed-gas selectivity; CO <sub>2</sub> /N <sub>2</sub> =2.5:97.5<br>2.5 kPa; 373K | 11 |
| DAB; Bul                                                                                                                                                | Polycondensation                                                       | Diff. degree of N-quaternisation | T   | 100       | 11 - 21  | 15 - 40      | ideal permselectivity<br>20 atm; 30 °C                                            | 12 |
| [ViEhIm][NTf <sub>2</sub> ];<br>[ViEtPy][NTf <sub>2</sub> ];<br>[Pyr11][NTf <sub>2</sub> ];<br>[EMTMA][NTf <sub>2</sub> ];<br>[EMCh][NTf <sub>2</sub> ] | Free radical polymerisation; conditioning with ILs                     |                                  | T   | 145 - 190 | 20 - 34  | 3 - 20       | ideal permselectivity<br>20 °C                                                    | 13 |
| P[DADMA]Cl                                                                                                                                              | Anion metathesis; conditioning with IL                                 |                                  | T   | 120 - 150 | 40 - 65  | 3 - 440      | ideal permselectivity<br>20 °C                                                    | 14 |
| imidazolium-based poly(RTIL) and an alkyl non-ionic polymer.                                                                                            | Living polymerisation                                                  |                                  | TFC | 13 - 18   | 9 - 27   | 30 - 9300    | ideal permselectivity                                                             | 15 |
| PTAUDMA                                                                                                                                                 | Removal of the protective group and simultaneous thio-Michael reaction |                                  | T   | -         | 24       | 71           | ideal permselectivity                                                             | 16 |
| Pebax® 1657, 2533; [BMIM][Tf <sub>2</sub> N]                                                                                                            | Polymer conditioning with IL                                           | Polymer gel membranes            | T   | -         | 40       | 300          | ideal permselectivity                                                             | 17 |
| [EMIM][Tf <sub>2</sub> N]; p(VDF-HFP)                                                                                                                   | Polymer conditioning with IL                                           | Polymer gel membranes            | T   | -         | 30       | 533          | ideal permselectivity                                                             | 18 |
| [EMIM][TFSI]; [HdMIM][TFSI]; p(VDF-HFP)                                                                                                                 | Polymer conditioning with IL                                           | Polymer gel membranes            | T   | -         | 27       | 14           | ideal permselectivity                                                             | 19 |
| Poly(diphenylacetylene)s imidazolium salts                                                                                                              |                                                                        |                                  | T   | 50 - 60   | 11 - 16  | 1.5 - 250    | ideal permselectivity                                                             | 20 |
| PVC                                                                                                                                                     | Atom transfer radical polymerisation                                   |                                  | T   | 80        | 20 - 25  | 7.5 - 137    | ideal permselectivity                                                             | 21 |

## References

- 1 J. Tang, Y. Shen, M. Radosz and W. Sun, in *Ind. Eng. Chem. Res.*, 2009, **48**, 9113-9118.
- 2 S. Kanehashi, M. Kishida, T. Kidesaki, R. Shindo, S. Sato, T. Miyakoshi and K. Nagai, in *J. Membr. Sci.*, 2013, **430**, 211-222.
- 3 R.S. Bhavsar, S.C. Kumbharkar and U.K. Kharul, in *J. Membr. Sci.*, 2012, **389**, 305-315.
- 4 A. Blasig, J. Tang, X. Hu, Y. Shen and M. Radosz, in *Fluid Phase Equilibria*, 2007, **256**, 75-80.
- 5 L. Ansaloni, J.R. Nykaza, Y. Ye, Y.A. Elabd and M.G. Baschetti, in *J. Membr. Sci.*, 2015, **487**, 199-208.
- 6 J.E. Bara, S. Lessmann, C.J. Gabriel, E.S. Hatakeyama, R.D. Noble and D.L. Gin, in *Ind. Eng. Chem. Res.*, 2007, **46**, 5397-5404.
- 7 J.E. Bara, C.J. Gabriel, E.S. Hatakeyama, T.K. Carlisle, S. Lessmann, R.D. Noble and D.L. Gin, in *J. Membr. Sci.*, 2009, **321**, 3-7.
- 8 J.E. Bara, E.S. Hatakeyama, D.L. Gin and R.D. Noble, in *Polym. Adv. Technol.*, 2008, **19**, 1415-1420.
- 9 R.S. Bhavsar, S.C. Kumbharkar and U.K. Kharul, in *J. Membr. Sci.*, 2014, **470**, 494-503.
- 10 S.U. Hong, D. Park, Y. Ko and I. Baek, in *Chem. Commun.*, 2009, **46**, 7227-7229.
- 11 S. Kasahara, E. Kamio, A. Yoshizumi and H. Matsuyama, in *Chem. Commun.*, 2014, **50**, 2996-2999.
- 12 A.S. Rewar, R.S. Bhavsar, K. Sreekumar and U.K. Kharul, in *J. Membr. Sci.*, 2015, **481**, 19-27.
- 13 L.C. Tomé, A.S.L. Gouveia, C.S.R. Freire, D. Mecerreyes and I.M. Marrucho, in *J. Membr. Sci.*, 2015, **486**, 40-48.
- 14 L.C. Tomé, M. Isik, C.S.R. Freire, D. Mecerreyes and I.M. Marrucho, in *J. Membr. Sci.*, 2015, **483**, 155-165.
- 15 P.T. Nguyen, E.F. Wiesenauer, D.L. Gin and R.D. Noble, in *J. Membr. Sci.*, 2013, **430**, 312-320.
- 16 B.J. Adzima, S.R. Venna, S.S. Klara, H. He, M. Zhong, D.R. Luebke, M.S. Mauter, K. Matyjaszewski and H.B. Nulwala, in *J. Mater. Chem. A*, 2014, **2**, 7967-7972.
- 17 P. Bernardo, J.C. Jansen, F. Bazzarelli, F. Tasselli, A. Fuoco, K. Friess, P. Izák, V. Jarmarová, M. Kačírková and G. Clarizia, in *Sep. Purif. Technol.*, 2012, **97**, 73-82.
- 18 K. Friess, J.C. Jansen, F. Bazzarelli, P. Izák, Veronika Jarmaková, M. Kačírková, J. Schauer, G. Clarizia and P. Bernardo, in *J. Membr. Sci.*, 2012, **415-416**, 801-809.
- 19 J.C. Jansen, G. Clarizia, P. Bernardo, F. Bazzarelli, K. Friess, A. Randová, J. Schauer, D. Kubicka, M. Kačírková and P. Izák, in *Sep. Purif. Technol.*, 2013, **109**, 87-97.
- 20 T. Sakaguchi, H. Ito, T. Masudo and T. Hashimoto, in *Polymer*, 2013, **54**, 6709-6715.
- 21 W.S. Chi, S.U. Hong, B. Jung, S.W. Kang, Y.S. Kang and J.H. Kim, in *J. Membr. Sci.*, 2013, **443**, 54-61.
